# Supplementary material for: Microwave-assisted synthesis of novel julolidinyl-based nonlinear optical chromophores with enhanced electro-optic activity
Source: Royal Society of Chemistry journal article supplement (doi:10.1039/c4ra10078f), 2014-01-01
Supplement: c4ra10078f1.pdf [file c4ra10078f1.pdf]

## *Supporting Information*

# **Microwave-assisted Synthesis of Novel Julolidinyl-Based Nonlinear Optical Chromophores with Enhanced Electro-optic Activity**

Airui Zhang,<sup>†,‡</sup> Hongyan Xiao,<sup>†</sup> Chengcheng Peng,<sup>†,‡</sup> Shuhui Bo,<sup>\*,†</sup> Guowei Deng,<sup>†,‡</sup> Huajun Xu,<sup>†,‡</sup>  
Maolin Zhang,<sup>†,‡</sup> Zhen Zhen,<sup>\*,†</sup> and Xinhou Liu<sup>†</sup>

<sup>†</sup>Key Laboratory of Photochemical Conversion and Optoelectronic Materials, Technique  
Institute of Physics and Chemistry, Chinese Academy of Sciences, Beijing, 100190, PR China

<sup>‡</sup>University of Chinese Academy of Sciences, Beijing 100049, PR China

- 1. The redox potentials for three chromophores.**
- 2. Quantum mechanical calculations.**

- 1. Fig. S1 The redox potentials for chromophores A, B and C**

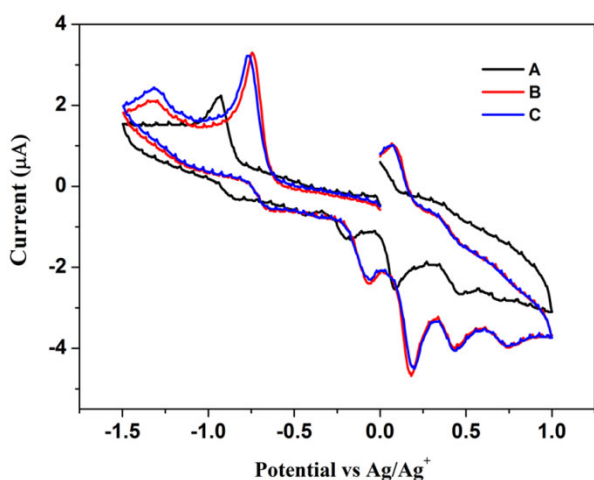

## 2. Quantum mechanical calculations.

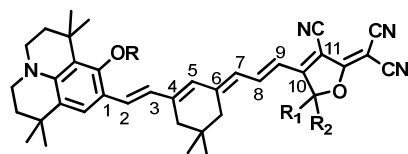

Fig. S2 Numbering of the carbon atoms in the conjugated bridge for chromophores A, B and C.

| Cmpd | Sol | C <sub>1-2</sub> | C <sub>2-3</sub> | C <sub>3-4</sub> | C <sub>4-5</sub> | C <sub>5-6</sub> | C <sub>6-7</sub> | C <sub>7-8</sub> | C <sub>8-9</sub> | C <sub>9-10</sub> | C <sub>10-11</sub> | BLA    |
|------|-----|------------------|------------------|------------------|------------------|------------------|------------------|------------------|------------------|-------------------|--------------------|--------|
| A    | VC  | 1.448            | 1.370            | 1.438            | 1.382            | 1.427            | 1.388            | 1.415            | 1.383            | 1.415             | 1.398              | -0.044 |
|      | DO  | 1.444            | 1.373            | 1.435            | 1.386            | 1.423            | 1.394            | 1.410            | 1.389            | 1.409             | 1.404              | -0.035 |
|      | CF  | 1.441            | 1.376            | 1.431            | 1.391            | 1.418            | 1.400            | 1.404            | 1.395            | 1.403             | 1.411              | -0.025 |
|      | DC  | 1.438            | 1.378            | 1.429            | 1.394            | 1.415            | 1.403            | 1.401            | 1.398            | 1.399             | 1.415              | -0.019 |
|      | AC  | 1.436            | 1.380            | 1.427            | 1.396            | 1.413            | 1.406            | 1.399            | 1.401            | 1.396             | 1.418              | -0.014 |
|      | AN  | 1.436            | 1.381            | 1.426            | 1.396            | 1.412            | 1.407            | 1.397            | 1.402            | 1.395             | 1.419              | -0.012 |
| B    | VC  | 1.447            | 1.371            | 1.437            | 1.384            | 1.425            | 1.392            | 1.411            | 1.387            | 1.409             | 1.400              | -0.039 |
|      | DO  | 1.441            | 1.376            | 1.431            | 1.391            | 1.417            | 1.400            | 1.403            | 1.395            | 1.400             | 1.409              | -0.024 |
|      | CF  | 1.435            | 1.381            | 1.426            | 1.397            | 1.411            | 1.407            | 1.396            | 1.403            | 1.392             | 1.418              | -0.011 |
|      | DC  | 1.432            | 1.384            | 1.422            | 1.401            | 1.407            | 1.412            | 1.392            | 1.407            | 1.388             | 1.423              | -0.003 |
|      | AC  | 1.429            | 1.386            | 1.419            | 1.404            | 1.403            | 1.416            | 1.388            | 1.411            | 1.385             | 1.427              | 0.004  |
|      | AN  | 1.428            | 1.387            | 1.418            | 1.405            | 1.402            | 1.417            | 1.387            | 1.412            | 1.383             | 1.429              | 0.007  |
| C    | VC  | 1.447            | 1.371            | 1.437            | 1.384            | 1.425            | 1.392            | 1.411            | 1.387            | 1.409             | 1.400              | -0.039 |
|      | DO  | 1.441            | 1.376            | 1.431            | 1.391            | 1.417            | 1.400            | 1.403            | 1.395            | 1.400             | 1.409              | -0.024 |
|      | CF  | 1.435            | 1.381            | 1.426            | 1.397            | 1.411            | 1.407            | 1.396            | 1.403            | 1.393             | 1.417              | -0.011 |
|      | DC  | 1.432            | 1.384            | 1.422            | 1.401            | 1.407            | 1.412            | 1.392            | 1.407            | 1.388             | 1.423              | -0.003 |
|      | AC  | 1.429            | 1.386            | 1.419            | 1.404            | 1.403            | 1.416            | 1.388            | 1.411            | 1.385             | 1.427              | 0.004  |
|      | AN  | 1.428            | 1.387            | 1.418            | 1.406            | 1.402            | 1.417            | 1.387            | 1.412            | 1.383             | 1.429              | 0.007  |

[a]: VC: vacuum; DO: 1,4-dioxane; CF: chloroform; DC: dichloromethane; AC: acetone; AN: acetonitrile.
